# Supplementary material for: Large negative magneto-LC effects induced by racemic dimerization of liquid crystalline nitroxide radicals with a terminal cyano group
Source: Royal Society of Chemistry journal article supplement (doi:10.1039/c7tc04699e), 2017-01-01
Supplement: c7tc04699e1.pdf [file c7tc04699e1.pdf]

## Supporting Information

Large negative magneto-LC effects induced by racemic dimerization of liquid crystalline nitroxide radicals with terminal cyano group

Takuya Akita, Daichi Kiyohara, Taira Yamazaki, Yoshiaki Uchida\* and Norikazu Nishiyama

*Graduate School of Engineering Science, Osaka University, 1-3 Machikaneyama-cho, Toyonaka, Osaka 560-8531, Japan. \*E-mail: yuchida@cheng.es.osaka-u.ac.jp*

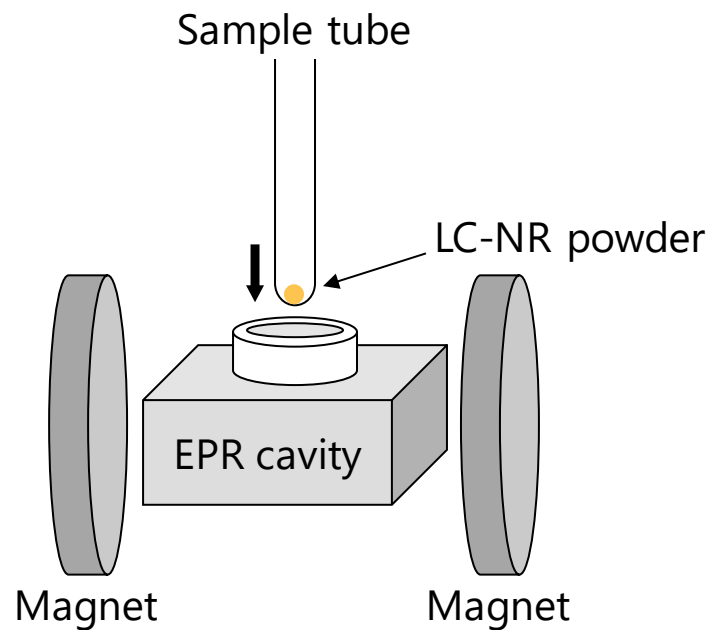

**Fig. S1** Experimental setup to measure EPR spectra.

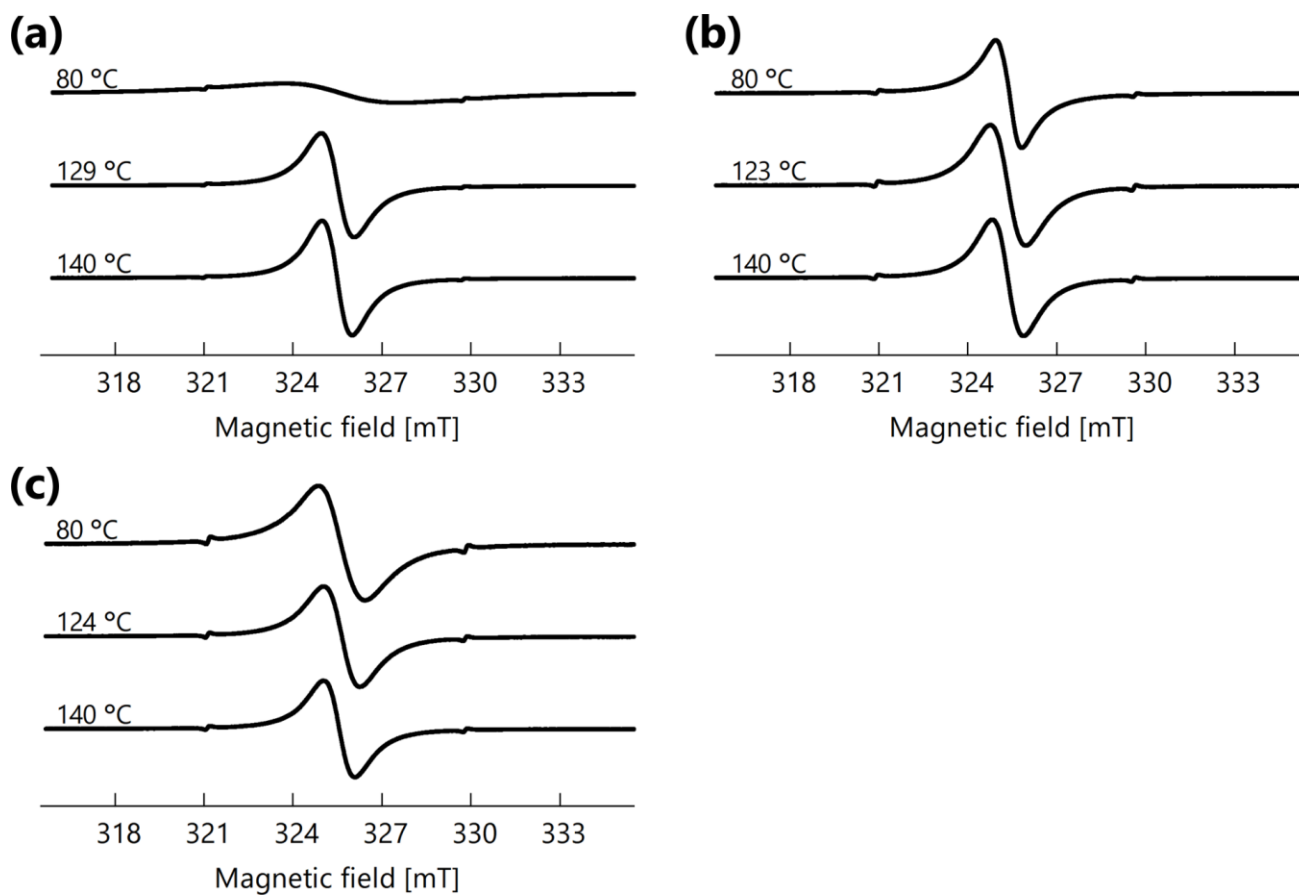

**Fig. S2** Selected EPR spectra of (a)  $(\pm)$ -**3**, (b)  $(2R,5R)$ -**3** and (c)  $(\pm)$ -**4** measured at various temperatures from the crystalline phase (top) to the isotropic phase (bottom) through the liquid crystalline phase.

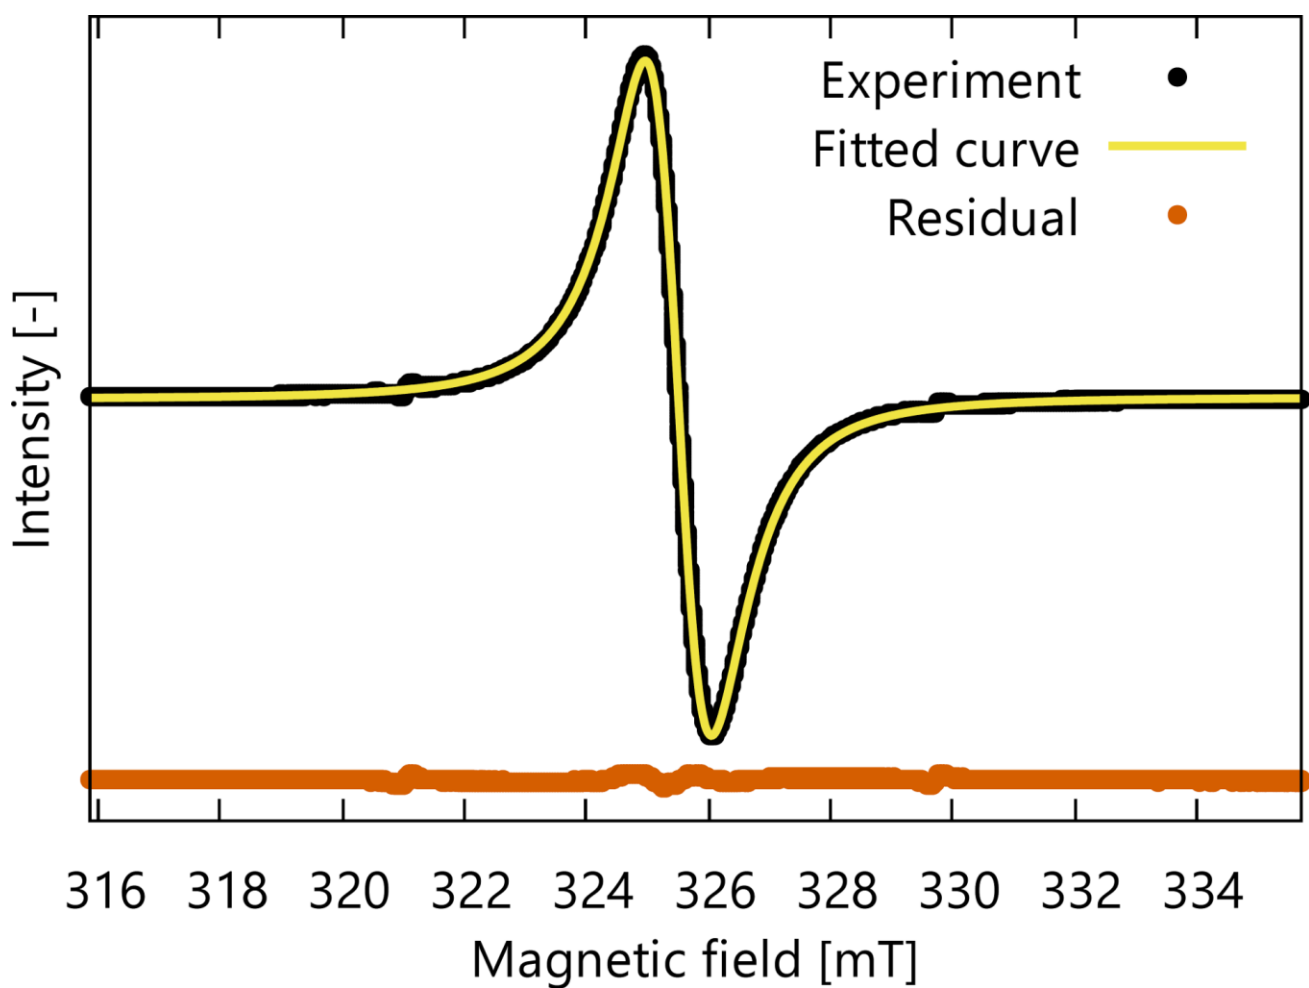

**Fig. S3** Selected EPR spectrum of ( $\pm$ )-**3** at 129 °C in heating process. Experimental data (black circles), a fitted curve of differential Lorentzian function (yellow solid line) and little residuals between them (red circles) are shown.

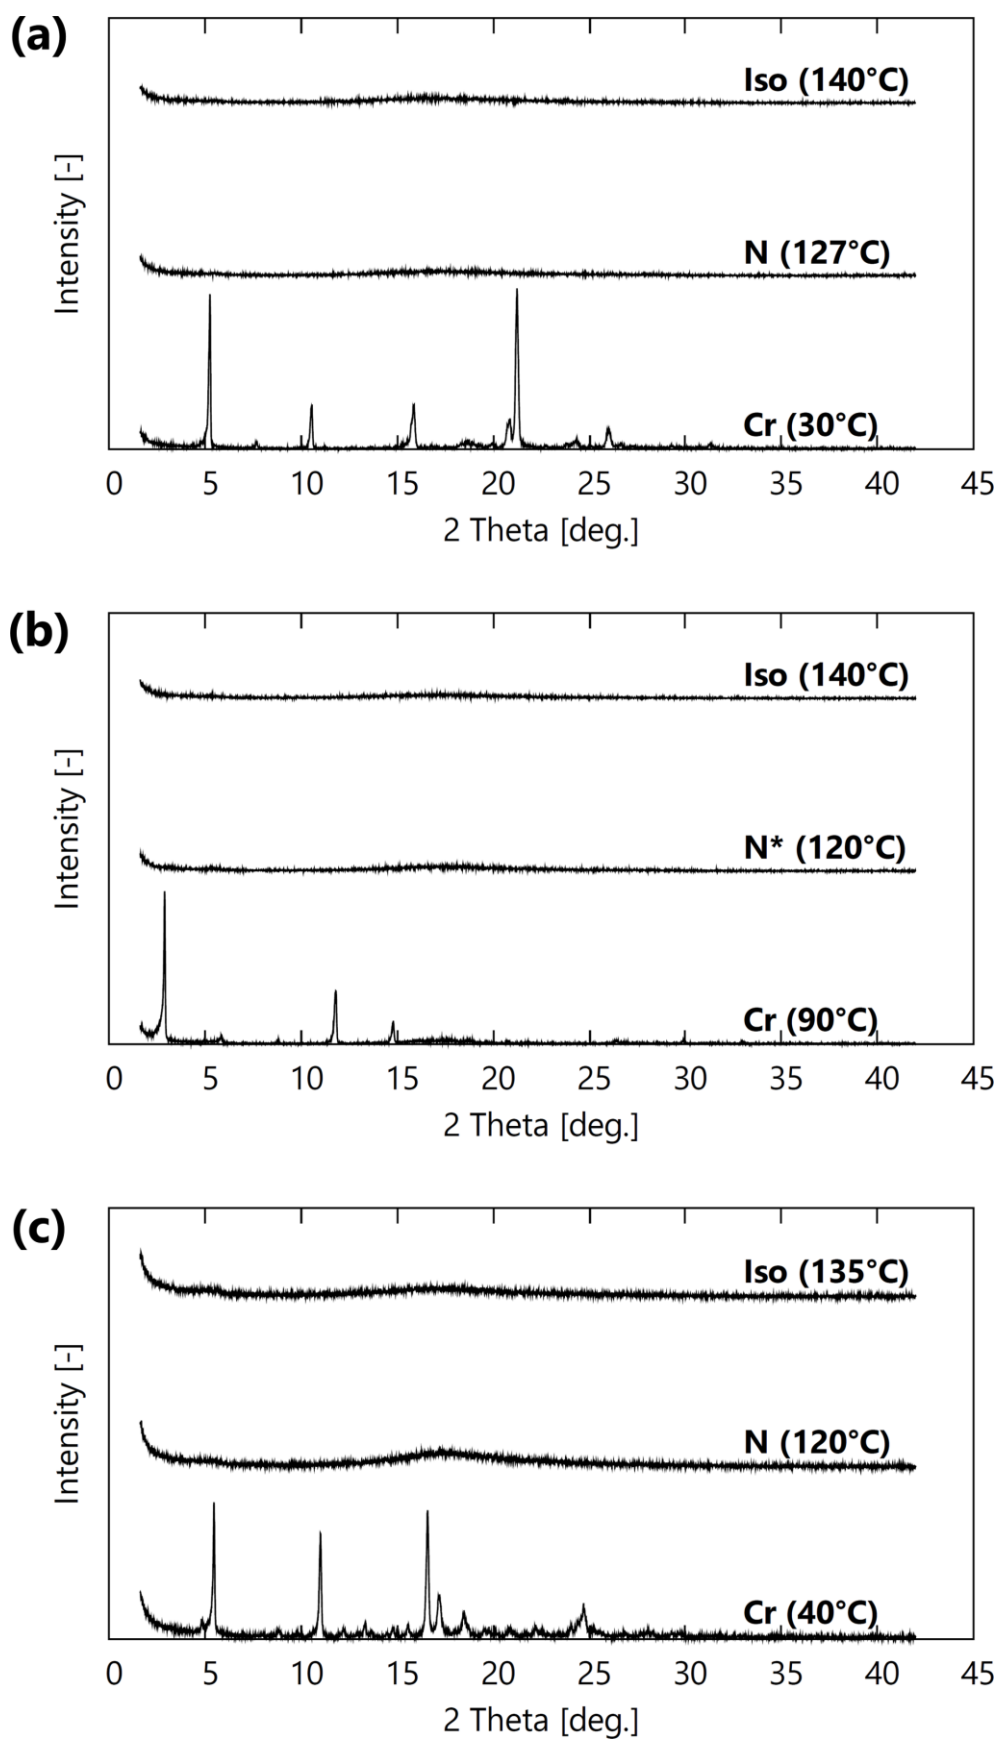

**Fig. S4** XRD patterns of (a)  $(\pm)$ -3, (b)  $(2R,5R)$ -3 and (c)  $(\pm)$ -4 in Cr, LC and Iso phases in the heating processes.

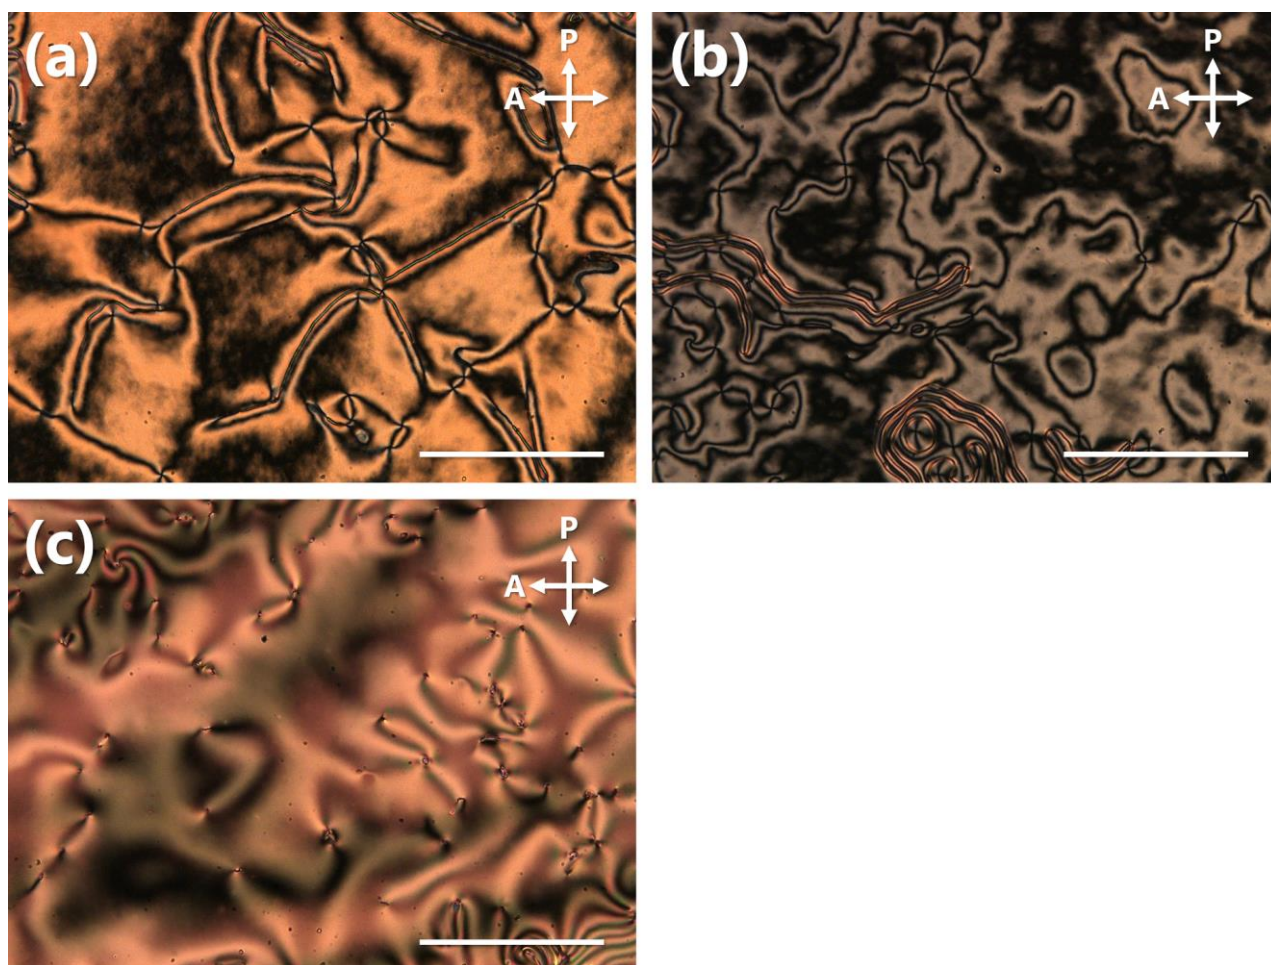

**Fig. S5** Polarized optical micrographs of Schlieren textures for the N phase of (±)-2 at 90 °C in cells coated with (a) JALS-204, (b) hexadecyltrimethylammonium bromide ( $C_{16}TAB$ ) and (c) CYTOP. The orientations of polarizer (P) and analyzer (A) are shown. Scale bars correspond to 200  $\mu m$ .

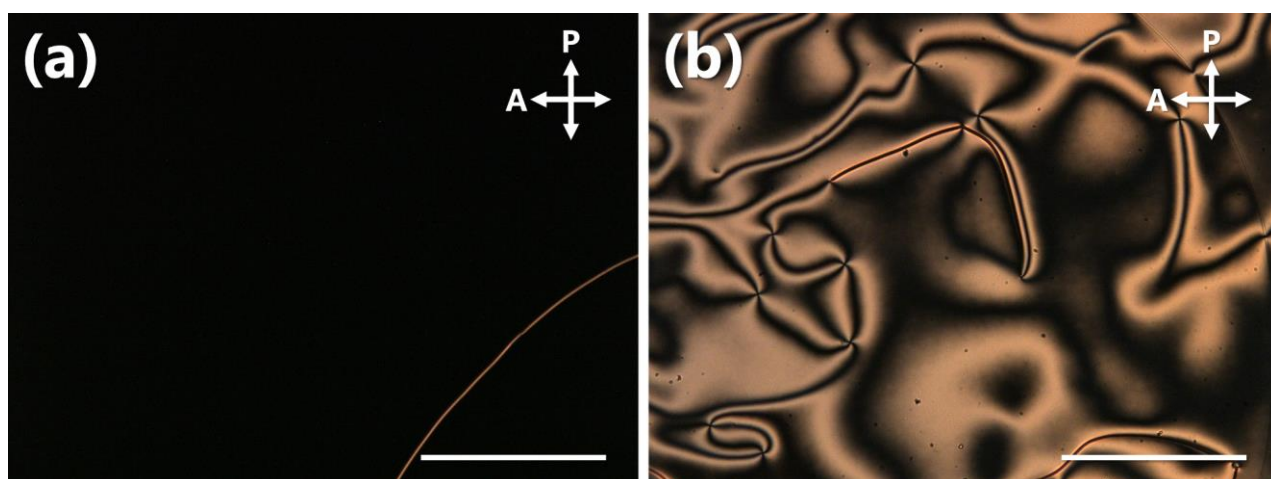

**Fig. S6** Polarized optical micrographs of (±)-3. (a) A pseudo isotropic state for the N phase at 125 °C in a cell coated with  $C_{16}TAB$ . The bottom-right corner in the image contains no sample. (b) A Schlieren texture for the N phase at 125 °C in a cell coated with CYTOP. The orientations of polarizer (P) and analyzer (A) are shown. Scale bars correspond to 200  $\mu m$ .

### Determination of the crystal structure of ( $\pm$ )-3

Crystals of ( $\pm$ )-3 suitable for XRD studies were prepared by the recrystallization from hexane and Et<sub>2</sub>O, and analyzed using an X-ray diffractometer. The X-ray crystal structure of ( $\pm$ )-3 was solved by direct methods and refined using the full-matrix least-squares method. In subsequent refinements, the function  $\sum \omega(F_o^2 - F_c^2)^2$  was minimized, where  $F_o$  and  $F_c$  are the observed and calculated structure factor amplitudes, respectively. The positions of non-hydrogen atoms were determined from difference Fourier electron-density maps and refined anisotropically. All calculations were performed with the Crystal Structure crystallographic software package.

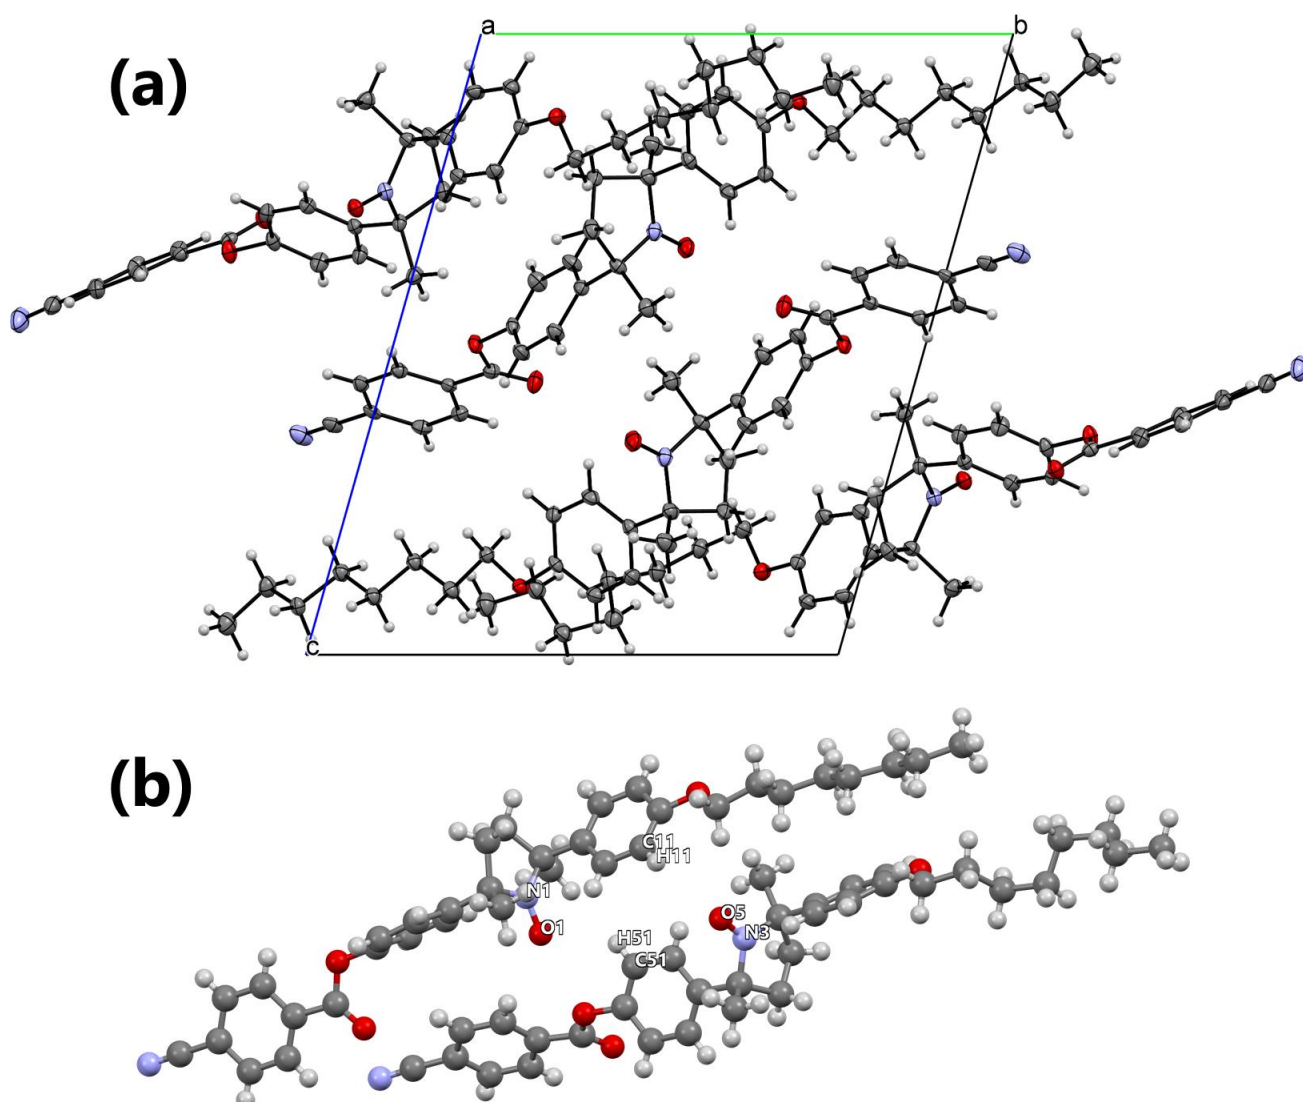

**Fig. S7** (a) Crystal structure of ( $\pm$ )-3 determined by X-ray crystallographic analysis and (b) relative position of a pair of molecules in the crystal showing intermolecular interactions between the NO radical group and the methyl group.

**Table S1** Calculated spin density values of ( $\pm$ )-**3**.

| Atom | Spin density |
|------|--------------|
| N1   | 0.456679     |
| O1   | 0.479352     |
| C11  | 0.003377     |
| H11  | 0.000931     |
| N3   | -0.447483    |
| O5   | -0.491305    |
| C51  | -0.001340    |
| H51  | 0.000597     |

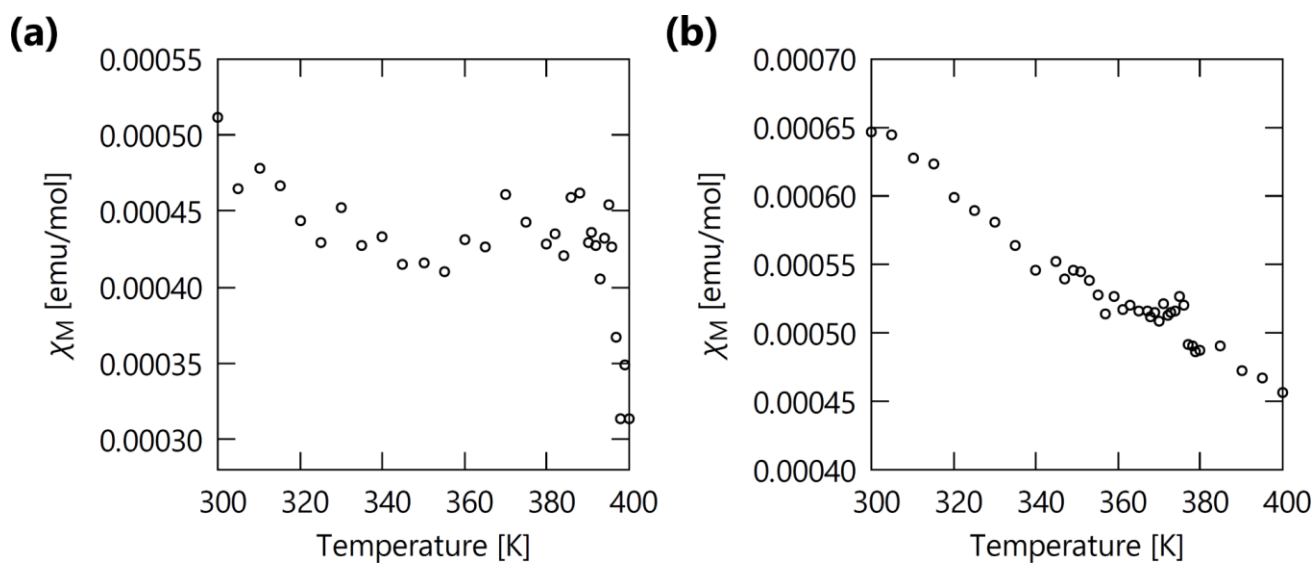

**Fig. S8** Temperature dependences of molar magnetic susceptibility ( $\chi_M$ ) observed by SQUID of (a) ( $\pm$ )-**3** and (b) (*2R,5R*)-**3** at a field of 0.05 T in the first heating process.



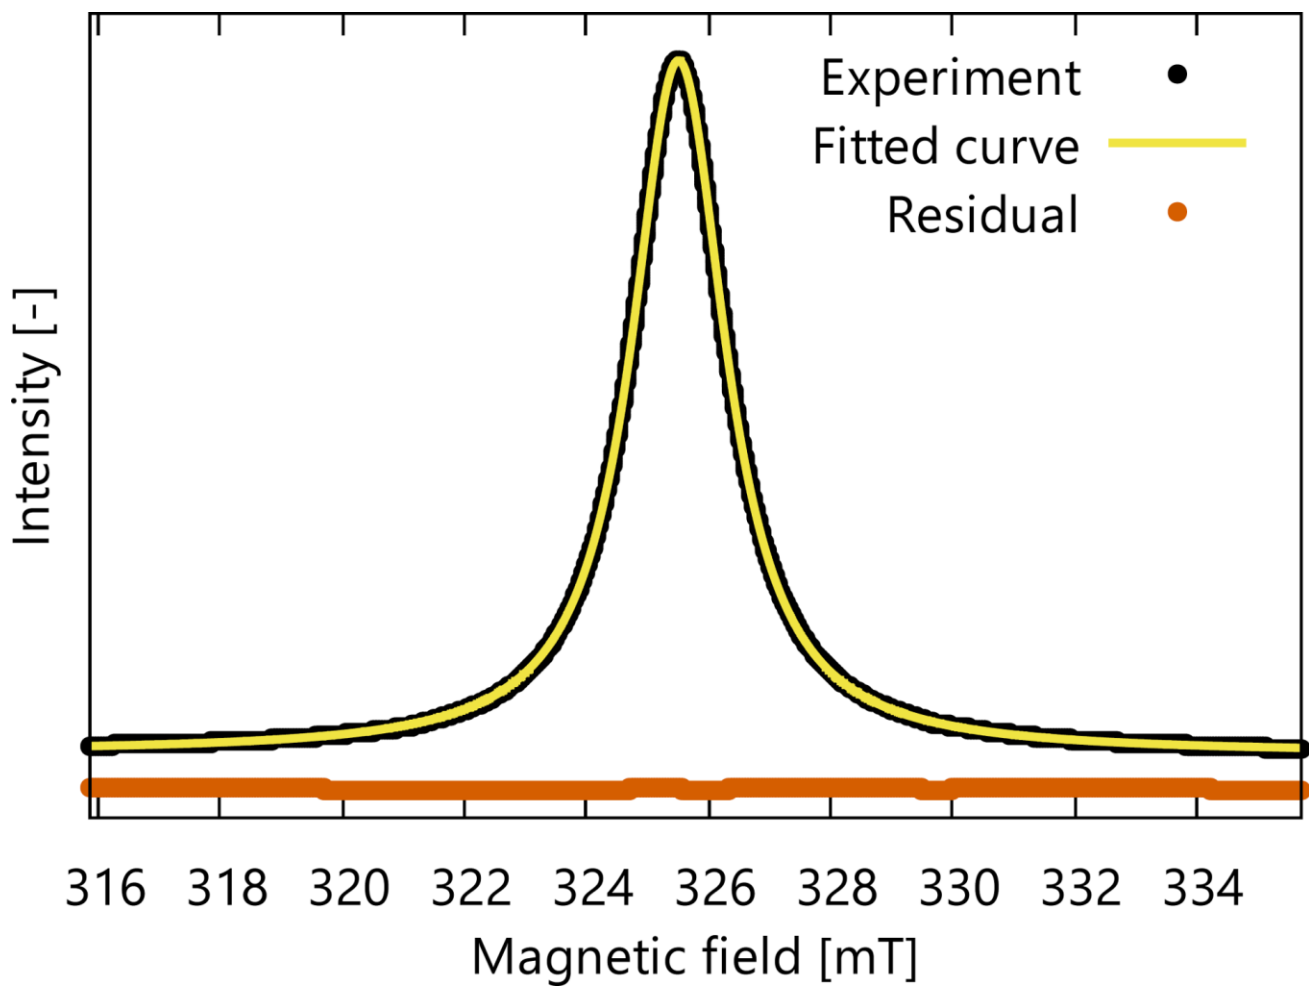

**Fig. S9** Selected EPR spectrum in the integral form of  $(\pm)\text{-}3$  at 129 °C in heating process. Experimental data (black circles), a fitted curve of Voigt function (yellow solid line) and little residuals between them (red circles) are shown.
